# Supplementary material
Source: PubMed Central journal article supplement (PMC153049)

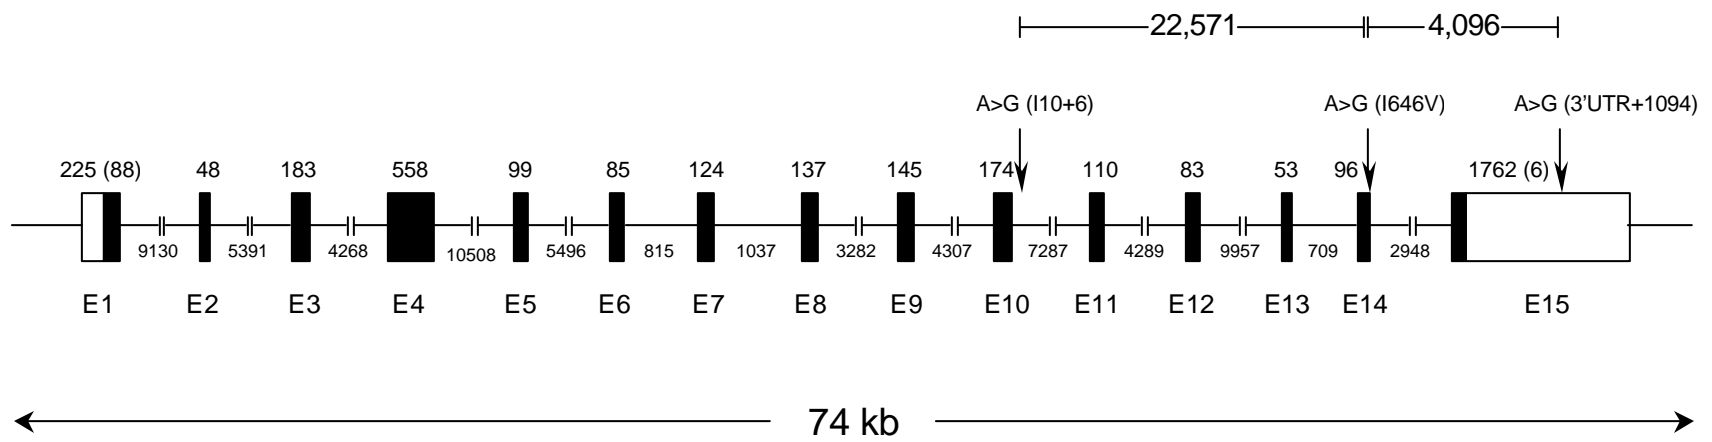

Supplement: pnas_2628028100_2.pdf [file pnas_2628028100_2.pdf]
